# Supplementary material for: Viral Latency in Blood and Saliva of Simian Foamy Virus-Infected Humans
Source: PubMed Central journal article supplement (PMC3792900; doi:10.1371/journal.pone.0077072), 2013-10-08
Supplement: pone.0077072.s001.pdf [file pone.0077072.s001.pdf]

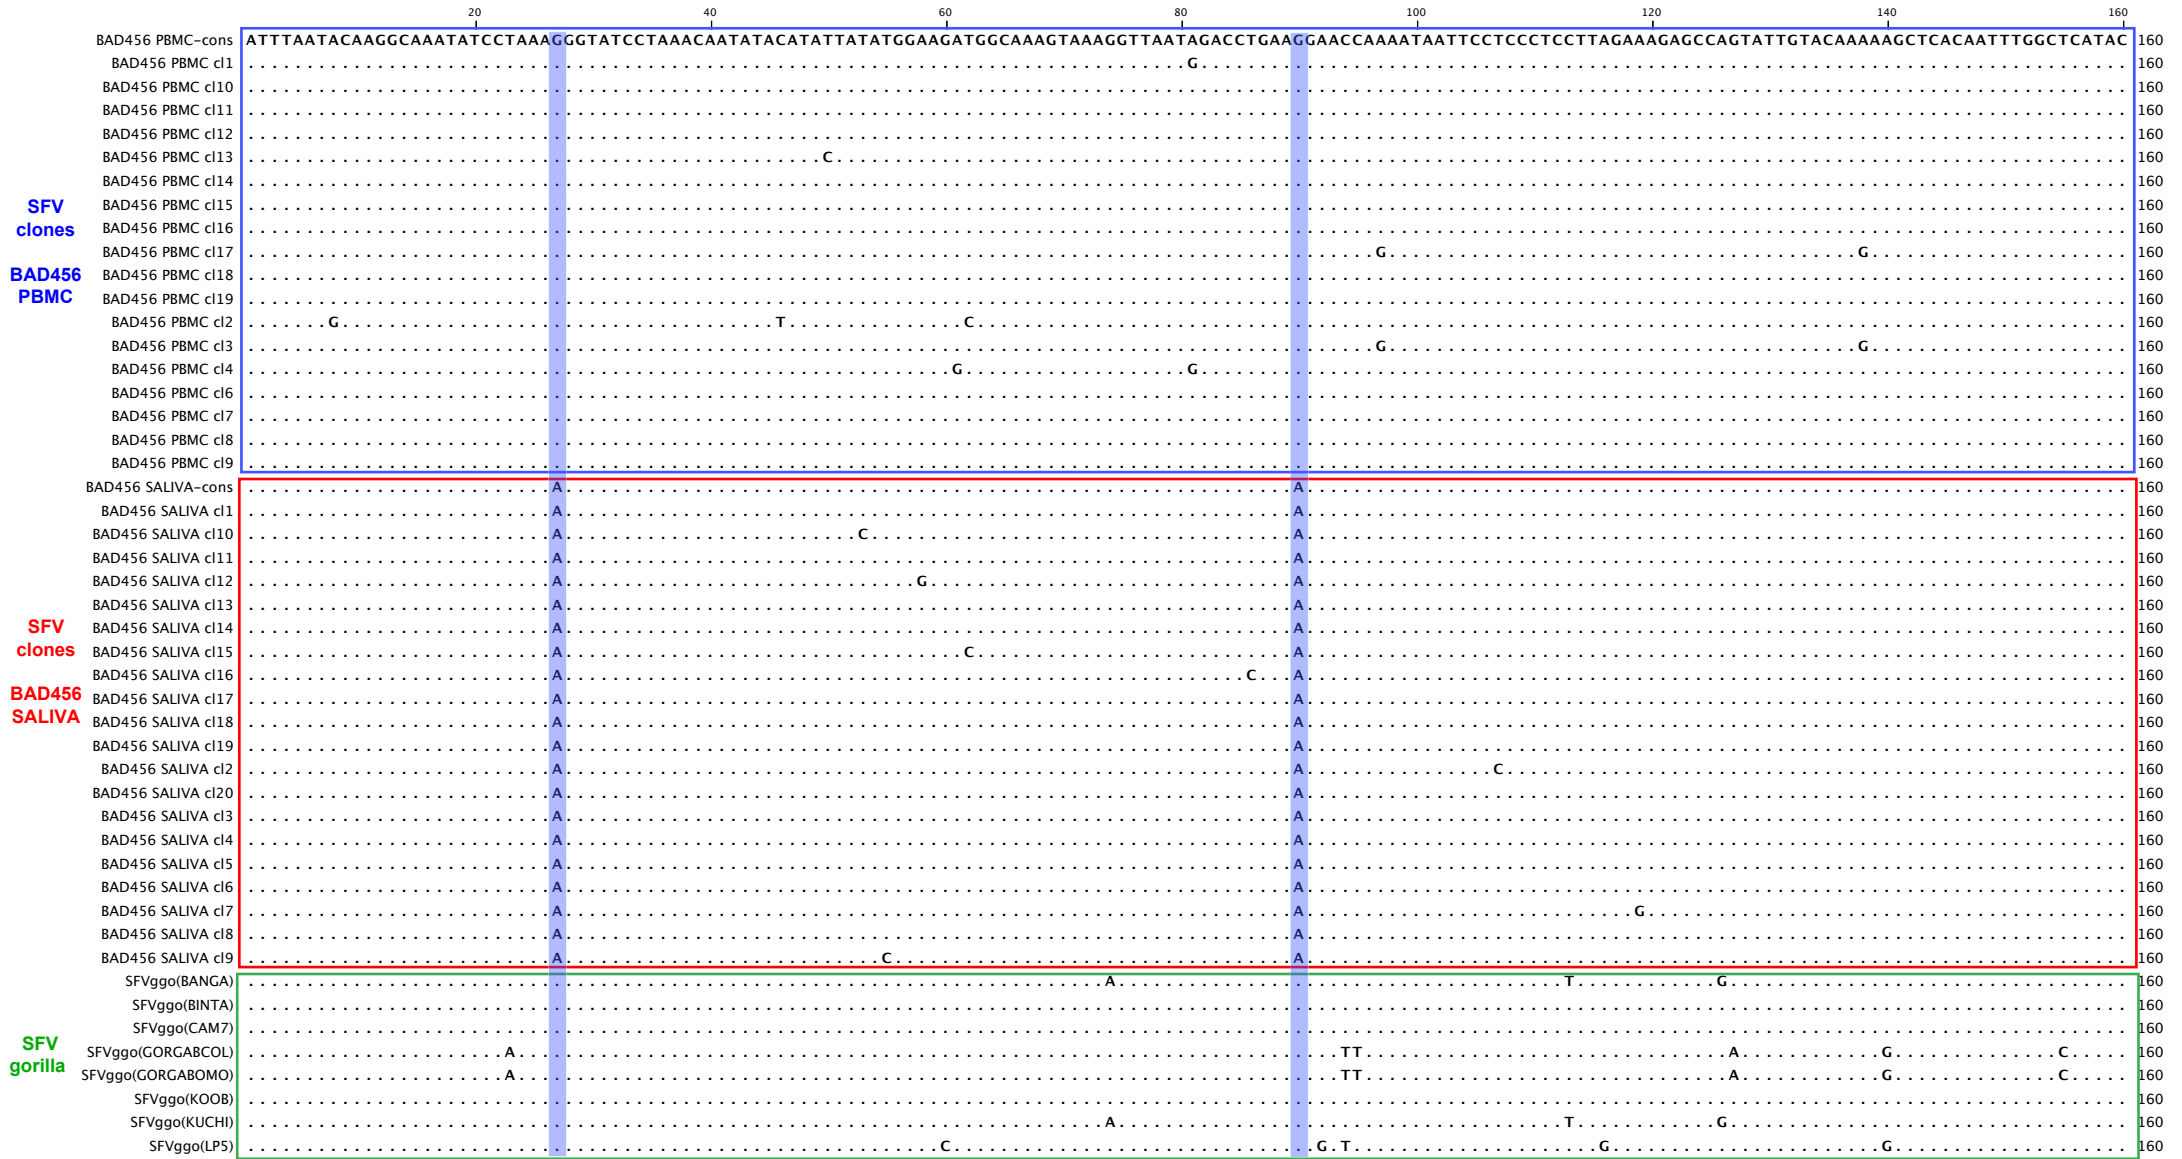

**Figure S1: Analysis of viral sequences from SFV-infected human BAD456.** Uncultured PBMCs and saliva samples from BAD456 hunter accidentally infected by a *Gorilla gorilla* SFV strain were analyzed for the presence of SFV sequences. A total of 18 and 20 different PCR-derived clones are depicted for PBMCs (blue) and saliva (red) samples respectively. Their consensus sequences (PBMC-cons and SALIVA-cons, respectively) are also depicted. The 8 reference SFV sequences available in GenBank from gorillas of the *Gorilla gorilla* species are aligned (green). 5 G-to-A mutations found in the hunter samples in a GG dinucleotide context and absent in the 8/8 gorillas sequences are highlighted in blue. Sequences are aligned to the consensus sequence of PBMCs samples, which served as a reference due to its high similarity with gorilla strains. The 425bp-fragment of the *pol-in* sequence is shown. Due to the low SFV viral load, BAD456 clones of each cluster might derive from one to few *in vivo* SFV copies.

|                    | 180                                                                                              | 200                                                          | 220 | 240 | 260 | 280 | 300 | 320 |
|--------------------|--------------------------------------------------------------------------------------------------|--------------------------------------------------------------|-----|-----|-----|-----|-----|-----|
| BAD456 PBMC-cons   | TGGTAGAGAAGCTACTCTTTTAAAAATTGCTAACTTATATGGTGGCCTAATATGAGGAAGGATGTGGTTAAACAGCTGGGACGCTGTCAGCAGTGT | TTAGTCACGAACTTTTAATCAAACCTCAGGCCCTATTTTGGCGCTACAAGGCCTTTGAAG |     |     |     |     |     |     |
| BAD456 PBMC cl1    |                                                                                                  | C                                                            |     |     |     |     |     |     |
| BAD456 PBMC cl10   |                                                                                                  | T                                                            |     |     |     |     |     |     |
| BAD456 PBMC cl11   |                                                                                                  |                                                              |     |     |     |     |     |     |
| BAD456 PBMC cl12   |                                                                                                  |                                                              |     |     |     |     |     |     |
| BAD456 PBMC cl13   |                                                                                                  |                                                              |     |     |     |     |     |     |
| BAD456 PBMC cl14   |                                                                                                  |                                                              |     |     |     |     |     |     |
| BAD456 PBMC cl15   |                                                                                                  |                                                              |     |     | G   |     |     |     |
| BAD456 PBMC cl16   |                                                                                                  |                                                              |     | A   |     |     |     |     |
| BAD456 PBMC cl17   |                                                                                                  |                                                              |     |     |     |     |     |     |
| BAD456 PBMC cl18   |                                                                                                  |                                                              |     |     |     | G   |     |     |
| BAD456 PBMC cl19   |                                                                                                  |                                                              |     |     |     |     |     |     |
| BAD456 PBMC cl2    |                                                                                                  |                                                              |     |     |     | G   |     |     |
| BAD456 PBMC cl3    |                                                                                                  |                                                              |     |     |     |     |     |     |
| BAD456 PBMC cl4    |                                                                                                  | C                                                            |     |     |     |     |     |     |
| BAD456 PBMC cl6    |                                                                                                  |                                                              | C   |     |     |     |     |     |
| BAD456 PBMC cl7    |                                                                                                  |                                                              |     |     |     |     |     |     |
| BAD456 PBMC cl8    |                                                                                                  |                                                              |     |     |     |     |     |     |
| BAD456 PBMC cl9    |                                                                                                  |                                                              |     |     |     |     |     |     |
| BAD456 SALIVA-cons |                                                                                                  |                                                              | A   |     |     |     | A   |     |
| BAD456 SALIVA cl1  |                                                                                                  |                                                              | A   |     |     |     | A   |     |
| BAD456 SALIVA cl10 |                                                                                                  |                                                              | A   |     |     |     | A   |     |
| BAD456 SALIVA cl11 |                                                                                                  |                                                              | A   |     |     |     | A   |     |
| BAD456 SALIVA cl12 |                                                                                                  | C                                                            |     |     |     |     | A   |     |
| BAD456 SALIVA cl13 |                                                                                                  |                                                              |     |     | C   |     | A   | G   |
| BAD456 SALIVA cl14 |                                                                                                  |                                                              |     |     |     |     | A   |     |
| BAD456 SALIVA cl15 |                                                                                                  |                                                              |     |     | C   | C   | A   |     |
| BAD456 SALIVA cl16 |                                                                                                  |                                                              |     |     |     |     | A   |     |
| BAD456 SALIVA cl17 |                                                                                                  |                                                              |     |     |     |     | A   |     |
| BAD456 SALIVA cl18 |                                                                                                  |                                                              |     |     |     |     | A   |     |
| BAD456 SALIVA cl19 |                                                                                                  |                                                              |     |     |     |     | A   |     |
| BAD456 SALIVA cl2  |                                                                                                  |                                                              | C   |     |     |     | A   |     |
| BAD456 SALIVA cl20 |                                                                                                  |                                                              |     |     |     |     | A   |     |
| BAD456 SALIVA cl3  |                                                                                                  |                                                              |     |     |     | G   | A   | A   |
| BAD456 SALIVA cl4  |                                                                                                  |                                                              |     |     |     |     | A   |     |
| BAD456 SALIVA cl5  |                                                                                                  |                                                              |     |     |     |     | A   |     |
| BAD456 SALIVA cl6  |                                                                                                  |                                                              |     |     |     |     | A   |     |
| BAD456 SALIVA cl7  |                                                                                                  |                                                              |     |     |     |     | A   |     |
| BAD456 SALIVA cl8  |                                                                                                  |                                                              |     |     |     |     | A   |     |
| BAD456 SALIVA cl9  |                                                                                                  | C                                                            |     |     |     |     | A   | T   |
| SFVggo(BANGA)      |                                                                                                  | C                                                            |     |     | G   |     | A   | G   |
| SFVggo(BINTA)      |                                                                                                  |                                                              |     |     |     |     |     | G   |
| SFVggo(CAM7)       |                                                                                                  |                                                              |     |     |     |     |     | G   |
| SFVggo(GORGABCOL)  | C                                                                                                | G                                                            | C   |     | A   | A   | A   | TG  |
| SFVggo(GORGABOMO)  | C                                                                                                | G                                                            | C   |     | A   | A   | A   | TG  |
| SFVggo(KOOB)       |                                                                                                  |                                                              |     |     |     |     |     | G   |
| SFVggo(KUCHI)      |                                                                                                  |                                                              | C   |     | G   |     | A   | G   |
| SFVggo(LP5)        | G                                                                                                |                                                              | TC  |     |     | A   | A   | C   |
|                    |                                                                                                  |                                                              |     |     |     |     |     | TG  |
|                    |                                                                                                  |                                                              |     |     |     |     |     | A   |

|                    | 340                 | 360                                                                    | 380   | 400        | 420   |     |
|--------------------|---------------------|------------------------------------------------------------------------|-------|------------|-------|-----|
| BAD456 PBMC-cons   | CCTTTTGATAAATTTTCAT | TGATTATATTGGACCTTTGCCACCCTCTAATGGATATTTGCATGTTCTTGTAATTGTTGATAGTATGACT | GGTTT | CACATGGTTA |       | 425 |
| BAD456 PBMC cl1    | .....               | .....                                                                  | ..... | .....      | ..... | 425 |
| BAD456 PBMC cl10   | .....               | .....                                                                  | ..... | .....      | ..... | 425 |
| BAD456 PBMC cl11   | .....               | .....                                                                  | ..... | .....      | ..... | 425 |
| BAD456 PBMC cl12   | .....               | .....                                                                  | ..... | .....      | ..... | 425 |
| BAD456 PBMC cl13   | .....               | .....                                                                  | ..... | .....      | ..... | 425 |
| BAD456 PBMC cl14   | .....               | .....                                                                  | ..... | .....      | ..... | 425 |
| BAD456 PBMC cl15   | .....               | .....                                                                  | ..... | .....      | ..... | 425 |
| BAD456 PBMC cl16   | .....               | .....                                                                  | ..... | .....      | ..... | 425 |
| BAD456 PBMC cl17   | .....               | .....                                                                  | ..... | .....      | ..... | 425 |
| BAD456 PBMC cl18   | .....               | .....                                                                  | ..... | .....      | ..... | 425 |
| BAD456 PBMC cl19   | .....               | .....                                                                  | ..... | .....      | ..... | 425 |
| BAD456 PBMC cl2    | .....               | .....                                                                  | ..... | .....      | ..... | 425 |
| BAD456 PBMC cl3    | .....               | .....                                                                  | ..... | .....      | ..... | 425 |
| BAD456 PBMC cl4    | .....               | .....                                                                  | ..... | .....      | ..... | 425 |
| BAD456 PBMC cl6    | .....               | .....                                                                  | ..... | .....      | ..... | 425 |
| BAD456 PBMC cl7    | .....               | .....                                                                  | ..... | .....      | ..... | 425 |
| BAD456 PBMC cl8    | .....               | .....                                                                  | ..... | .....      | ..... | 425 |
| BAD456 PBMC cl9    | .....               | .....                                                                  | ..... | .....      | ..... | 425 |
| BAD456 SALIVA-cons | .....               | .....                                                                  | ..... | .....      | ..... | 425 |
| BAD456 SALIVA cl1  | .....               | .....                                                                  | ..... | .....      | ..... | 425 |
| BAD456 SALIVA cl10 | .....               | .....                                                                  | ..... | .....      | ..... | 425 |
| BAD456 SALIVA cl11 | .....               | .....                                                                  | ..... | .....      | ..... | 425 |
| BAD456 SALIVA cl12 | .....               | .....                                                                  | ..... | .....      | ..... | 425 |
| BAD456 SALIVA cl13 | .....               | .....                                                                  | ..... | .....      | ..... | 425 |
| BAD456 SALIVA cl14 | .....               | .....                                                                  | ..... | .....      | ..... | 425 |
| BAD456 SALIVA cl15 | .....               | .....                                                                  | ..... | .....      | ..... | 425 |
| BAD456 SALIVA cl16 | .....               | .....                                                                  | ..... | .....      | ..... | 425 |
| BAD456 SALIVA cl17 | .....               | .....                                                                  | ..... | .....      | ..... | 425 |
| BAD456 SALIVA cl18 | .....               | .....                                                                  | ..... | .....      | ..... | 425 |
| BAD456 SALIVA cl19 | .....               | .....                                                                  | ..... | .....      | ..... | 425 |
| BAD456 SALIVA cl2  | .....               | .....                                                                  | ..... | .....      | ..... | 425 |
| BAD456 SALIVA cl20 | .....               | .....                                                                  | ..... | .....      | ..... | 425 |
| BAD456 SALIVA cl3  | .....               | .....                                                                  | ..... | .....      | ..... | 425 |
| BAD456 SALIVA cl4  | .....               | .....                                                                  | ..... | .....      | ..... | 425 |
| BAD456 SALIVA cl5  | .....               | .....                                                                  | ..... | .....      | ..... | 425 |
| BAD456 SALIVA cl6  | .....               | .....                                                                  | ..... | .....      | ..... | 425 |
| BAD456 SALIVA cl7  | .....               | .....                                                                  | ..... | .....      | ..... | 425 |
| BAD456 SALIVA cl8  | .....               | .....                                                                  | ..... | .....      | ..... | 425 |
| BAD456 SALIVA cl9  | .....               | .....                                                                  | ..... | .....      | ..... | 425 |
| SFVggo(BANGA)      | .....               | .....                                                                  | ..... | .....      | ..... | 425 |
| SFVggo(BINTA)      | .....               | .....                                                                  | ..... | .....      | ..... | 425 |
| SFVggo(CAM7)       | .....               | .....                                                                  | ..... | .....      | ..... | 425 |
| SFVggo(GORGABCOL)  | .....               | .....                                                                  | ..... | .....      | ..... | 425 |
| SFVggo(GORGABOMO)  | .....               | .....                                                                  | ..... | .....      | ..... | 425 |
| SFVggo(KOOB)       | .....               | .....                                                                  | ..... | .....      | ..... | 425 |
| SFVggo(KUCHI)      | .....               | .....                                                                  | ..... | .....      | ..... | 425 |
| SFVggo(LP5)        | .....               | .....                                                                  | ..... | .....      | ..... | 425 |

SFV clones

BAD456 PBMC

SFV clones

BAD456 SALIVA

SFV gorilla
